# Supplementary material
Source: PubMed Central journal article supplement (PMC3073076)
Supplement: Supp_Data.pdf [file Supp_Data.pdf]

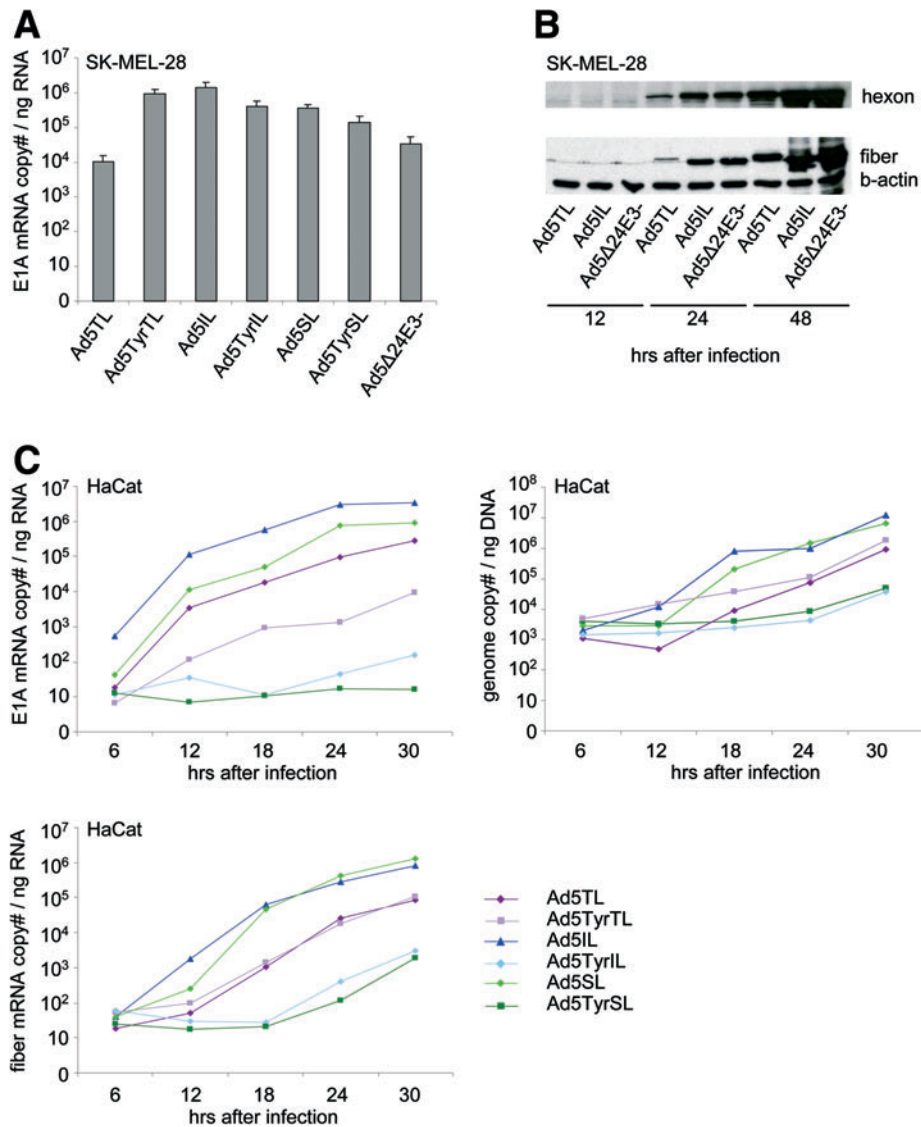

**SUPPLEMENTARY FIG. S1.** Viral gene expression and genome replication by transcriptionally targeted oncolytic adenoviruses with luciferase reporter gene inserted into the late transcription unit. (A) SK-MEL-28 cells were infected with IL, SL, TL or Ad5Δ24E3<sup>-</sup> adenoviruses at 10TCID<sub>50</sub>/cell. Cells were harvested one day post-infection and E1A mRNA copy numbers were quantified by qPCR. (B) SK-MEL-28 cells were infected with adenoviruses at 100TCID<sub>50</sub>/cell. Fiber and hexon expression was detected by Immunoblot at indicated time points post-infection. β-actin was detected as loading control. After western transfer, the membrane was used for detection of hexon protein, then stripped and subsequently used for detection of fiber and β-actin. (C) HaCat cells were infected with IL, SL, or TL adenoviruses at 10TCID<sub>50</sub>/cell. Cells were harvested at indicated time points post-infection. E1A mRNA, fiber mRNA and genome copy numbers were quantified by qPCR. (D) SK-MEL-28 or HaCat cells were infected with IL, SL, TL or Ad5Δ24E3<sup>-</sup> adenoviruses at 100TCID<sub>50</sub>/cell. Fiber expression was detected by Immunoblot one day post-infection. β-actin was detected as loading control. (E) HaCat or SK-MEL-28 cells were infected with SL or Ad5Δ24E3<sup>-</sup> adenoviruses at 10TCID<sub>50</sub>/cell, when indicated in the presence of AraC. Cells were harvested at indicated time points post-infection. E1A mRNA (SK-MEL-28 only) and genome copy numbers were quantified by qPCR. (F) SK-MEL-28 cells were infected with Ad5SL or Ad5Δ24E3<sup>-</sup> at 10TCID<sub>50</sub>/cell. Cells were harvested at indicated time points post-infection and E4 mRNA copy numbers were quantified by qPCR.

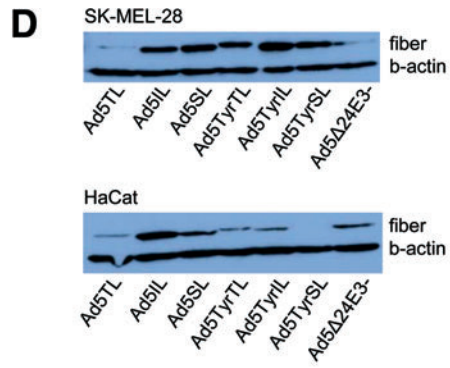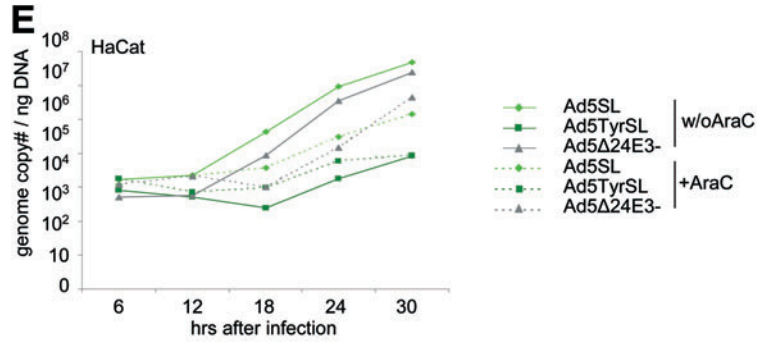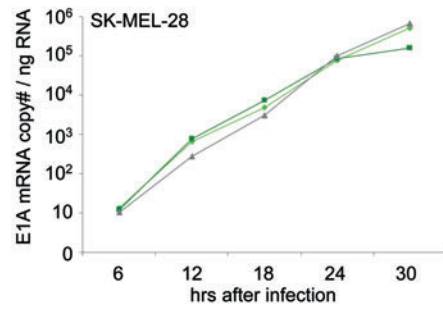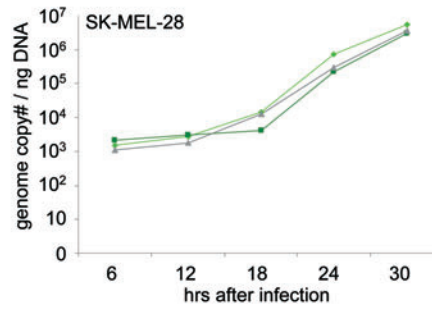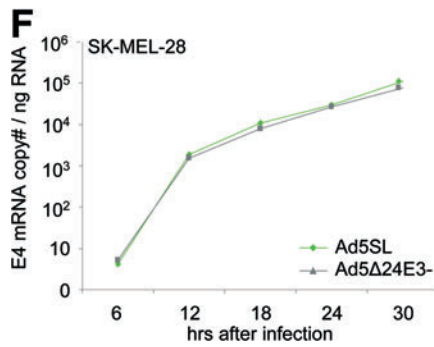

SUPPLEMENTARY FIG. S1. (Continued).
